# Supplementary material
Source: PubMed Central journal article supplement (PMC3147556)
Supplement: supp_79_8_3131__1.pdf [file supp_79_8_3131__1.pdf]

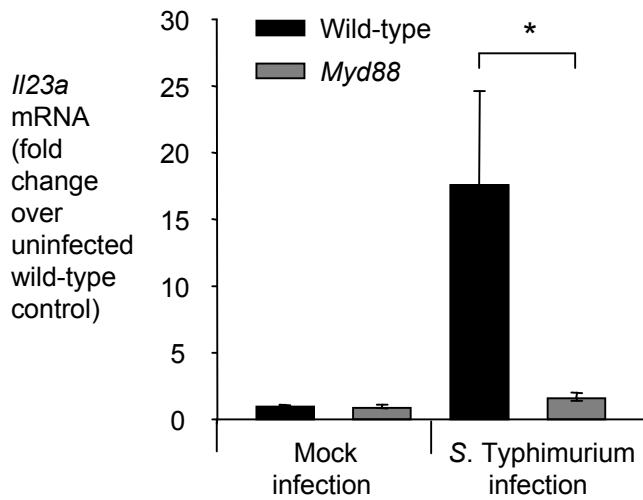

**Supplementary Figure 1:** Relative *I/23a* transcript levels determined after stimulation of splenocytes from C57BL/6 mice (wild-type, black bars) or MyD88-deficient mice (*Myd88*, grey bars) with *S. Typhimurium* or medium control using quantitative real-time PCR. Bars represent geometric means  $\pm$  standard error of three independent experiments.

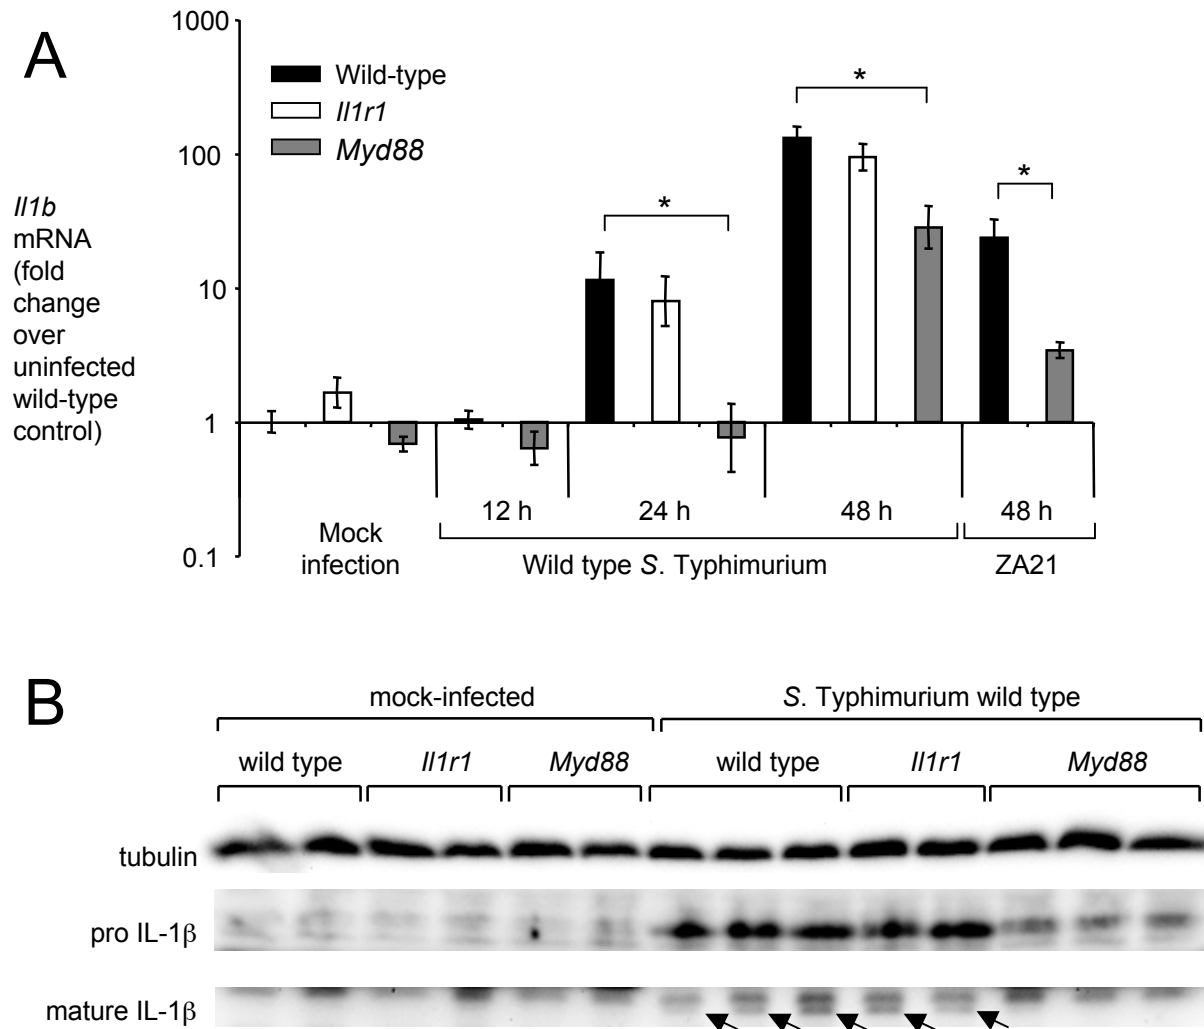

**Supplementary Figure 2:** IL-1 $\beta$  expression in the mouse colitis model. (A) Relative *I11b* transcript levels in the cecal mucosa were determined by quantitative real-time PCR using the mouse colitis model. C57BL/6 mice (wild-type, black bars), MyD88-deficient mice (*Myd88*, grey bars) or IL-1 receptor-deficient mice (*I11r1*, white bars) were inoculated with wild type *S. Typhimurium*, a non-invasive *S. Typhimurium* mutant (ZA21) or sterile medium (mock infection) and RNA extracted from the cecal mucosa at the indicated time points. Bars for mock-infected animals represent the combined geometric means  $\pm$  standard error from samples collected at 12, 24 and 48 hours after inoculation. All other bars represent geometric means  $\pm$  standard error from at least four different animals. (B) Detection of pro-IL-1 $\beta$  (middle panel) and IL-1 $\beta$  (arrows, bottom panel) by Western blot in protein extracts from the cecal mucosa of C57BL/6 mice (wild-type), MyD88-deficient mice (*Myd88*) or IL-1 receptor-deficient mice (*I11r1*) 48 hours after mock-infection or infection with wild type *S. Typhimurium*. Expression of tubulin was detected by Western blot as a loading control (top panel). Each lane contains protein extracted from the cecal mucosa of a different animal.

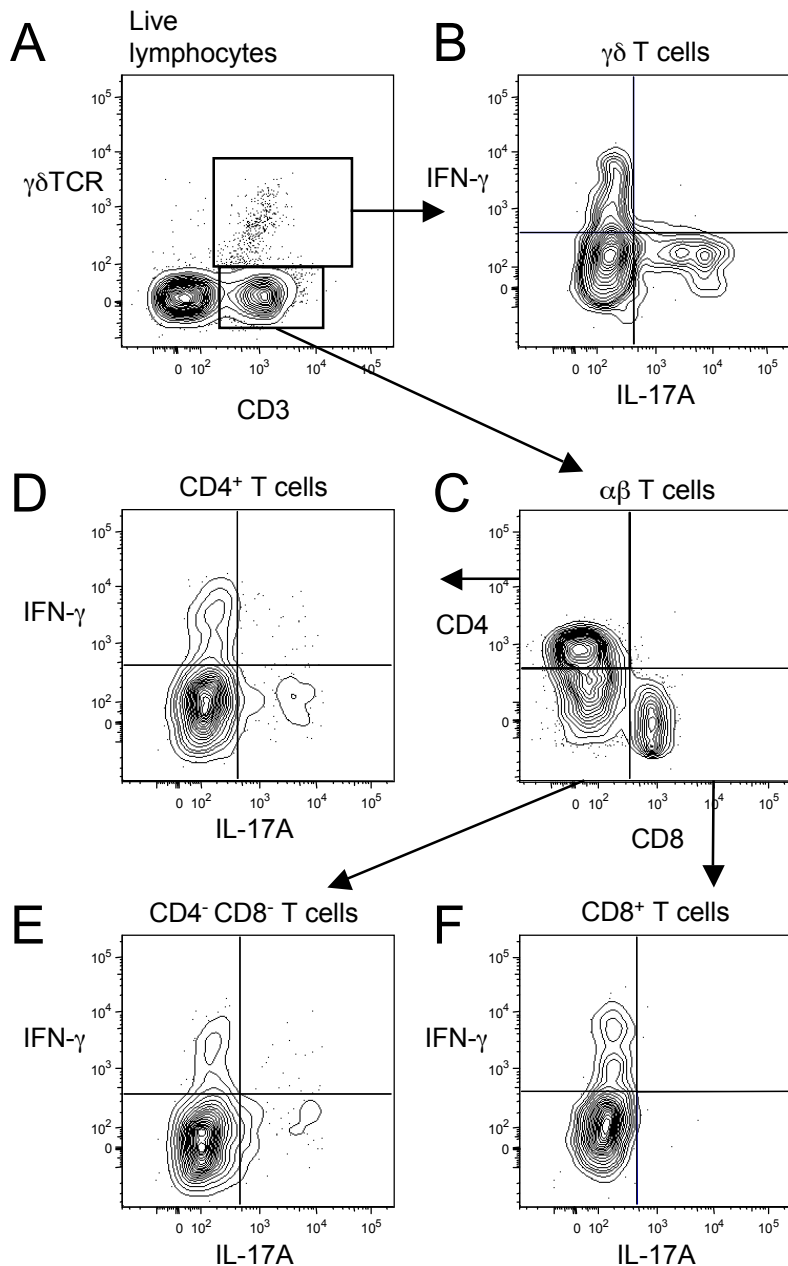

**Supplementary Figure 3:** Gating strategy for analysis of cytokine expression in intestinal T cell populations by flow cytometry. Forward scatter and side scatter characteristics of intestinal cells used to set a lymphocyte gate. Dead cells were excluded based on Dead/Live Aqua staining. Live lymphocytes (A) were gated into  $\gamma\delta$  T cells (CD3<sup>+</sup>  $\gamma\delta$  TCR<sup>+</sup>)(B) and  $\alpha\beta$  T cells (CD3<sup>+</sup>  $\gamma\delta$  TCR<sup>-</sup>)(C) populations. The  $\alpha\beta$  T cell population (C) was further subdivided into CD4<sup>+</sup>CD8<sup>-</sup> T cells (D), CD4<sup>-</sup>CD8<sup>-</sup> T cells (E) and CD4<sup>-</sup>CD8<sup>+</sup> T cells (F). CD4<sup>+</sup>CD8<sup>-</sup> T cells (D), CD4<sup>-</sup>CD8<sup>-</sup> T cells (E), CD4<sup>-</sup>CD8<sup>+</sup> T cells (F) and  $\gamma\delta$  T cells (B) were then analyzed for expression of IL-17A and IFN- $\gamma$ . Gates were based on Fluorescence-Minus-One controls.
